# Supplementary material
Source: PubMed Central journal article supplement (PMC4292477)
Supplement: AEM.02945-14_zam999105993so1.pdf [file AEM.02945-14_zam999105993so1.pdf]

Table S1. Collection information and hindgut diversity for cockroaches and termites used in this study. The diploid number of chromosomes (2n) is provided for populations of the *C. punctulatus* species complex. Genbank accession numbers are provided for the mitochondrial 16S rRNA gene sequences obtained from each insect. The number of described parabasalid species is based on previously published information. Sequencing, OTU, and diversity information are listed for the parabasalid (above) and bacterial (below) communities for each insect.

| Species                                         | Family         | Collection Location              | Genbank accession | Number of described parabasalid species | Number of reads | Number of OTUs | Shannon-Wiener diversity index | Pielou's evenness index |
|-------------------------------------------------|----------------|----------------------------------|-------------------|-----------------------------------------|-----------------|----------------|--------------------------------|-------------------------|
| <i>Cryptocercus punctulatus</i> MC <sup>a</sup> | Cryptocercidae | Mt. Collins, NC, USA (2n=45)     | KJ438360          | 19 <sup>f</sup>                         | 3013            | 15             | 1.58                           | 0.58                    |
|                                                 |                |                                  |                   |                                         | 4788            | 201            | 3.52                           | 0.66                    |
| <i>Cryptocercus punctulatus</i> ML <sup>a</sup> | Cryptocercidae | Mountain Lake, VA, USA (2n=43)   | KJ438361          | 19 <sup>f</sup>                         | 5627            | 17             | 0.94                           | 0.33                    |
|                                                 |                |                                  |                   |                                         | 4065            | 142            | 2.36                           | 0.48                    |
| <i>Cryptocercus punctulatus</i> SC <sup>a</sup> | Cryptocercidae | South Mountains, NC, USA (2n=43) | KJ438362          | 19 <sup>f</sup>                         | 5958            | 27             | 1.73                           | 0.53                    |
|                                                 |                |                                  |                   |                                         | 3137            | 153            | 2.91                           | 0.58                    |
| <i>Calcaritermes nearcticus</i> <sup>b</sup>    | Kalotermitidae | Florida, USA                     | KJ438364          | 5 <sup>f,g</sup>                        | 1124            | 8              | 1.72                           | 0.83                    |
|                                                 |                |                                  |                   |                                         | 1685            | 56             | 1.84                           | 0.46                    |
| <i>Calcaritermes nigriceps</i> <sup>b</sup>     | Kalotermitidae | Colombia                         | KJ438363          | 4 <sup>f,g</sup>                        | 916             | 7              | 1.34                           | 0.69                    |
|                                                 |                |                                  |                   |                                         | 9378            | 194            | 4.07                           | 0.77                    |
| <i>Cryptotermes</i> sp. <sup>b</sup>            | Kalotermitidae | Paraguay                         | KJ438365          | 0                                       | 2182            | 11             | 1.25                           | 0.52                    |
|                                                 |                |                                  |                   |                                         | 7399            | 105            | 2.54                           | 0.55                    |
| <i>Incisitermes banksi</i> <sup>b</sup>         | Kalotermitidae | Texas, USA                       | KJ438366          | 2 <sup>f,h</sup>                        | 1921            | 2              | 0.08                           | 0.12                    |

|                                                  |                |              |          |                  |       |     |      |      |
|--------------------------------------------------|----------------|--------------|----------|------------------|-------|-----|------|------|
|                                                  |                |              |          |                  | 2394  | 56  | 2.11 | 0.52 |
| <i>Incisitermes immigrans</i> <sup>c</sup>       | Kalotermitidae | Hawaii, USA  | JX679413 | 3 <sup>f</sup>   | 3305  | 5   | 0.36 | 0.22 |
|                                                  |                |              |          |                  | 1619  | 52  | 2.88 | 0.73 |
| <i>Incisitermes minor</i> <sup>b</sup>           | Kalotermitidae | Texas, USA   | JX847583 | 4 <sup>f</sup>   | 1157  | 11  | 1.13 | 0.47 |
|                                                  |                |              |          |                  | 2732  | 80  | 3.34 | 0.76 |
| <i>Incisitermes schwarzl</i> <sup>b</sup>        | Kalotermitidae | Colombia     | JX679414 | 1 <sup>f</sup>   | 1964  | 2   | 0.02 | 0.03 |
|                                                  |                |              |          |                  | 17086 | 200 | 4.03 | 0.76 |
| <i>Kalotermes approximatus</i> <sup>b</sup>      | Kalotermitidae | Florida, USA | KJ438367 | 0                | 1370  | 5   | 1.34 | 0.83 |
|                                                  |                |              |          |                  | 1286  | 33  | 1.82 | 0.52 |
| <i>Neotermes connexus</i> <sup>c</sup>           | Kalotermitidae | Hawaii, USA  | KJ438368 | 8 <sup>f</sup>   | 1526  | 7   | 1.01 | 0.52 |
|                                                  |                |              |          |                  | 1368  | 43  | 2.42 | 0.64 |
| <i>Neotermes holmgren</i> <sup>b</sup>           | Kalotermitidae | Colombia     | KJ438369 | 6 <sup>f,i</sup> | 1572  | 6   | 1.20 | 0.67 |
|                                                  |                |              |          |                  | 16032 | 227 | 4.17 | 0.77 |
| <i>Neotermes joutel</i> <sup>b</sup>             | Kalotermitidae | Florida, USA | KJ438370 | 4 <sup>f,j</sup> | 7408  | 4   | 0.89 | 0.65 |
|                                                  |                |              |          |                  | 1382  | 36  | 2.33 | 0.65 |
| <i>Paraneotermes simplicicornis</i> <sup>b</sup> | Kalotermitidae | Texas, USA   | KJ438371 | 9 <sup>f</sup>   | 1790  | 10  | 1.64 | 0.71 |
|                                                  |                |              |          |                  | 1639  | 87  | 3.83 | 0.86 |
| <i>Tauritermes</i> sp. <sup>b</sup>              | Kalotermitidae | Paraguay     | KJ438372 | 0                | 6123  | 9   | 0.77 | 0.35 |
|                                                  |                |              |          |                  | 7597  | 161 | 3.95 | 0.78 |

|                                                       |                  |                                            |          |                   |       |     |      |      |
|-------------------------------------------------------|------------------|--------------------------------------------|----------|-------------------|-------|-----|------|------|
| <i>Porotermes adamsoni</i> <sup>f</sup>               | Stolotermitidae  | Australia                                  | KJ438373 | g <sup>f</sup>    | 8776  | 14  | 1.91 | 0.73 |
|                                                       |                  |                                            |          |                   | 3547  | 18  | 0.81 | 0.28 |
| <i>Zootermopsis angusticollis</i> Cortes <sup>c</sup> | Archotermopsidae | Cortes Island, BC, Canada                  | KJ438375 | g <sup>f,k</sup>  | 5246  | 12  | 1.47 | 0.59 |
|                                                       |                  |                                            |          |                   | 3759  | 70  | 2.17 | 0.51 |
| <i>Zootermopsis angusticollis</i> PSP <sup>d</sup>    | Archotermopsidae | Pacific Spirit Park, Vancouver, BC, Canada | KJ438374 | g <sup>f,k</sup>  | 7246  | 14  | 1.76 | 0.67 |
|                                                       |                  |                                            |          |                   | 3640  | 72  | 2.09 | 0.49 |
| <i>Reticulitermes flavipes</i> <sup>e</sup>           | Rhinotermitidae  | Iowa, USA                                  | KC494361 | 11 <sup>f,l</sup> | 1218  | 4   | 0.50 | 0.36 |
|                                                       |                  |                                            |          |                   | 2398  | 105 | 3.66 | 0.79 |
| <i>Reticulitermes hesperus</i> <sup>c</sup>           | Rhinotermitidae  | Galiano Island, BC, Canada                 | KJ438376 | 5 <sup>f</sup>    | 4006  | 6   | 0.82 | 0.46 |
|                                                       |                  |                                            |          |                   | 3387  | 137 | 3.95 | 0.80 |
| <i>Reticulitermes okanaganensis</i> <sup>c</sup>      | Rhinotermitidae  | California, USA                            | KJ438377 | 0                 | 361   | 4   | 1.04 | 0.75 |
|                                                       |                  |                                            |          |                   | 1339  | 63  | 3.14 | 0.76 |
| <i>Reticulitermes virginicus</i> <sup>b</sup>         | Rhinotermitidae  | Florida, USA                               | JX975354 | 3 <sup>f,m</sup>  | 3169  | 9   | 1.03 | 0.47 |
|                                                       |                  |                                            |          |                   | 2378  | 125 | 3.78 | 0.78 |
| <i>Coptotermes testaceus</i> <sup>b</sup>             | Rhinotermitidae  | Colombia                                   | HQ683707 | 1 <sup>n</sup>    | 334   | 5   | 1.19 | 0.74 |
|                                                       |                  |                                            |          |                   | 2067  | 13  | 0.33 | 0.13 |
| <i>Coptotermes</i> sp. <sup>c</sup>                   | Rhinotermitidae  | Australia                                  | KJ438378 | 0                 | 3052  | 9   | 1.46 | 0.67 |
|                                                       |                  |                                            |          |                   | 11274 | 63  | 0.72 | 0.17 |
| <i>Heterotermes tenuis</i> <sup>b</sup>               | Rhinotermitidae  | Colombia                                   | HQ683708 | 6 <sup>f</sup>    | 1124  | 7   | 1.33 | 0.68 |

|                                            |                 |              |          |                  |      |    |      |      |
|--------------------------------------------|-----------------|--------------|----------|------------------|------|----|------|------|
|                                            |                 |              |          |                  | 1768 | 26 | 0.99 | 0.31 |
| <i>Prorhinotermes simplex</i> <sup>b</sup> | Rhinotermitidae | Florida, USA | JX975355 | 5 <sup>f,m</sup> | 5233 | 5  | 0.81 | 0.50 |
|                                            |                 |              |          |                  | 3372 | 14 | 0.29 | 0.11 |

collected by <sup>a</sup>C. Nalepa, <sup>b</sup>R. H. Scheffrahn, <sup>c</sup>P. J. Keeling, <sup>d</sup>V. Tai, and <sup>e</sup>B. Stay.

<sup>f</sup>Yamin, M.A. 1979. Flagellates of the orders Trichomonadida Kirby, Oxymonadida Grassé, and Hypermastigida Grassi and Foà reported from lower termites (Isoptera Families Mastotermitidae, Kalotermitidae, Hodotermitidae, Termopsidae, Rhinotermitidae, and Serritermitidae) and from the wood-feeding roach *Cryptocercus* (Dictyoptera, Cryptocercidae). *Sociobiology*. 4:3–119.

<sup>g</sup>Gile, G.H. et al. 2011. Molecular and morphological analysis of the family Calonymphidae with a description of *Calonympha chia* sp. nov., *Snyderella kirbyi* sp. nov., *Snyderella swezyae* sp. nov. and *Snyderella yamini* sp. nov. *Int J Syst Evol Micr*. 61:2547-2558.

<sup>h</sup>Harper, J.T. et al. 2009. The inadequacy of morphology for species and genus delineation in microbial eukaryotes: an example from the parabasal termite symbiont *Coronympha*. *PLoS ONE*. 4:e6577

<sup>i</sup>Dolan, M.F. and Kirby, H. 2002. *Gyronympha*, *Prosnyderella* and *Criconympha*, three new genera of calonymphids (Parabasalia: Trichomonadida) from wood-eating termites. *Europ. J. Protistol*. 38:73-81.

<sup>j</sup>Gile, G.H. et al. 2013. Morphology and molecular phylogeny of *Staurojoenina mulleri* sp. nov. (Trichonymphida, Parabasalia) from the hindgut of the kalotermitid *Neotermes jouteli*. *J Euk Microbiol*. 60:203-213.

<sup>k</sup>Tai, V. et al. 2013. Single-cell DNA barcoding using sequences from the small subunit rRNA and internal transcribed spacer region identifies new species of *Trichonympha* and *Trichomitopsis* from the hindgut of the termite *Zootermopsis angusticollis*. *PLoS ONE*. 8:e58728.

<sup>l</sup>Brugerolle, G. and Bordereau, C. 2006. Immunological and ultrastructural characterization of spirotrichonymphid flagellates from *Reticulitermes grassei* and *R. flavipes* (syn. *R. santonensis*), with special reference to *Spirotrichonympha*, *Spironympha* and *Microjoenia*. *Organisms Diversity and Evolution*. 6: 109-123.

<sup>m</sup>James, E. R. et al. 2013. *Cthulhu Macrofasciculumque* n. g., n. sp. and *Cthylla Microfasciculumque* n. g., n. sp., a newly identified lineage of parabasal termite symbionts. *PLoS ONE*. 8:e58509.

<sup>n</sup>Saldarriaga, J.F. et al. 2011. Morphology and molecular phylogeny of *Pseudotriconympha hertwigi* and *Pseudotriconympha paulistana* (Trichonymphida, Parabasalia) from neotropical rhinotermitids. *J Euk Microbiol*. 58:487-496.

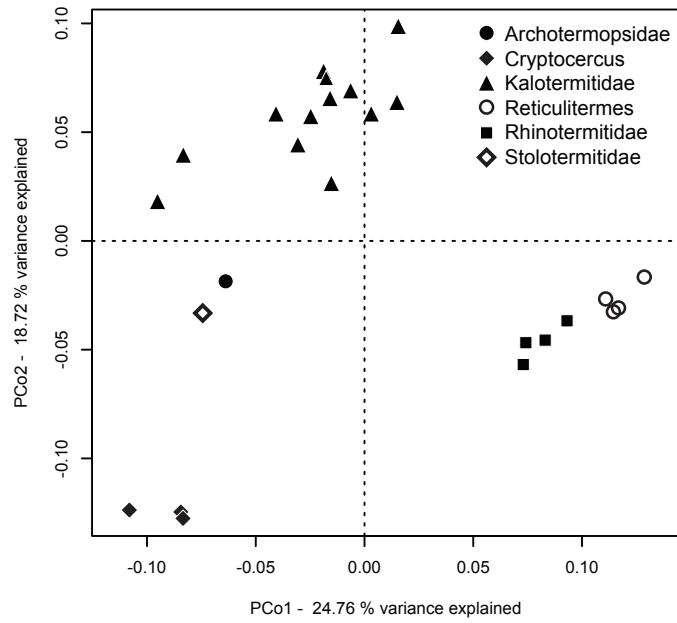

Figure S1. Principle coordinates analysis of the genetic distances between mitochondrial 16S rRNA sequences of the insects. The insects are represented by symbols based on their phylogenetic grouping: solid diamonds - Cryptocercidae, solid triangles - Kalotermitidae, open diamond - Stolotermitidae, solid circles - Archotermopsidae, open circles - Reticulitermes, and solid squares - Rhinotermitidae.

A

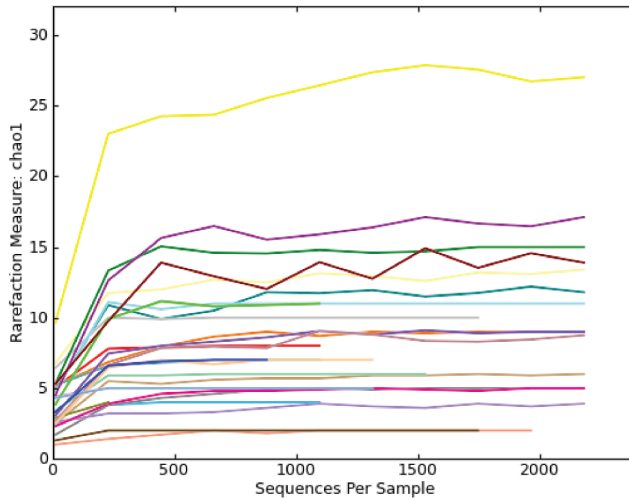

- *Calcaritermes nearcticus*
- *Calcaritermes nigriceps*
- *Coptotermes* sp.
- *Cryptocercus punctulatus* MC
- *Cryptocercus punctulatus* ML
- *Cryptocercus punctulatus* SM
- *Cryptotermes* sp.
- *Coptotermes testaceus*
- *Heteritermes tenuis*
- *Incisitermes banksi*
- *Incisitermes immigrans*
- *Incisitermes minor*
- *Incisitermes schwarzi*
- *Kalotermites approximatus*
- *Neotermites connexus*
- *Neotermites holmgreni*
- *Neotermites jouteli*
- *Porotermites adamsoni*
- *Paraneotermites simplicicornis*
- *Prorhinotermes simplex*
- *Reticulitermes flavipes*
- *Reticulitermes hesperus*
- *Reticulitermes okanaganensis*
- *Reticulitermes virginicus*
- *Tauritermes* sp.
- *Zootermopsis angusticollis* Cortes
- *Zootermopsis angusticollis* Van

B

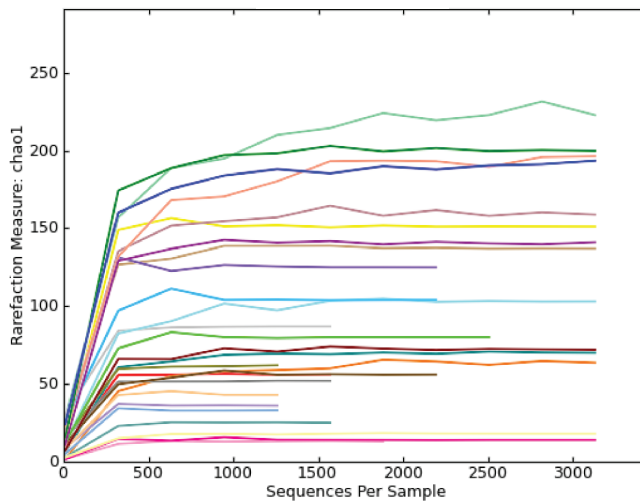

Figure S2. A) Rarefaction curves based on subsampled, normalized abundances calculated using the Chao1-estimator for parasitoid OTUs sampled from hindguts of *Cryptocercus* cockroaches and lower termites. B) Rarefaction curves for bacterial OTUs. Figure legend applies to both A and B.

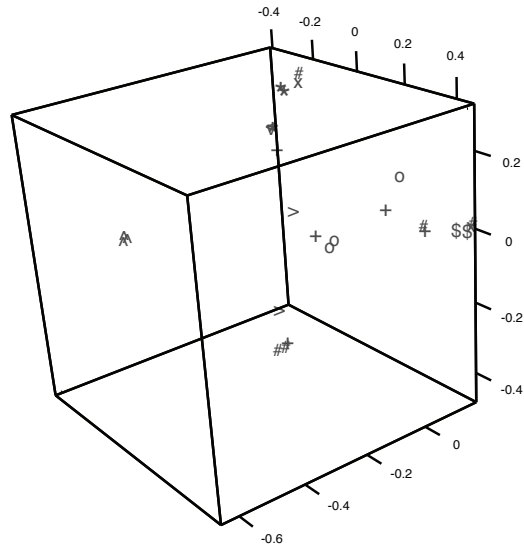

Figure S3. A) Principle coordinates analysis (PCoA) using unweighted UniFrac distances between parasabalid communities. The communities are represented by symbols based on the geographic sampling location of the host insect: > - Australia, < - California, # - Colombia, x - Hawaii, v - Iowa, + - Florida, \* - PacificNW, ^ - SouthAppalachian, o - Texas, and \$ - Paraguay.

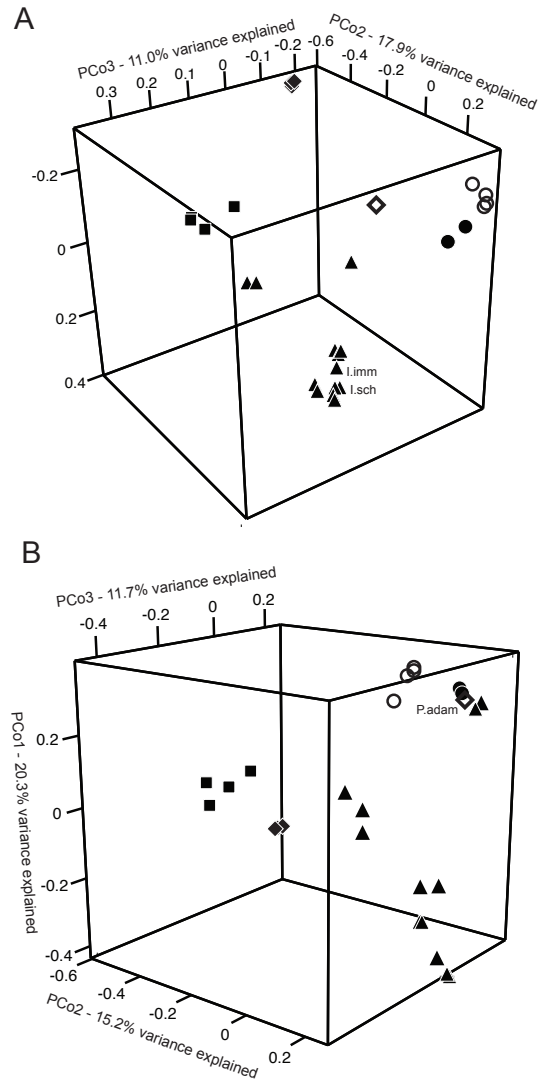

Figure S4. A) Principle coordinates analysis (PCoA) using unweighted UniFrac distances between parasitoid communities with *Trichonympha* OTUs removed from the *Incisitermes immigrans* and *Incisitermes schwarzi* hindgut communities. B) Unweighted UniFrac PCoA of the parasitoid communities with the Spirotrichonympha-like sequences removed from the *Porotermes adamsoni* community. The communities are represented by symbols based on the phylogenetic grouping of the host insect: solid diamonds - Cryptocercidae, solid triangles - Kalotermitidae, open diamond - Stolotermitidae, solid circles - Archotermopsidae, open circles - Reticulitermes, and solid squares - Rhinotermitidae.
